# Supplementary material for: HIV Self-testing and Risk Behaviors Among Men Who Have Sex With Men in 23 US Cities, 2017
Source: PubMed Central journal article supplement (PMC9856873; doi:10.1001/jamanetworkopen.2022.47540), 2022-12-19
Supplement: jamanetwopen-e2247540-s001.pdf [file jamanetwopen-e2247540-s001.pdf]

## Supplementary Online Content

Bien-Gund CH, Shaw PA, Agnew-Brune C, Baugher A, Brady KA, Gross R; NHBS Study Group. HIV self-testing and risk behaviors among men who have sex with men in 23 US cities, 2017. *JAMA Netw Open*. 2022;5(12):e2247540.  
doi:10.1001/jamanetworkopen.2022.47540

**eTable.** Self-Testing and Measures of HIV Stigma and Discrimination Against Sexual Minorities Among MSM in 23 US Cities, 2017

This supplementary material has been provided by the authors to give readers additional information about their work.

eTable: Self-Testing and measures of HIV stigma and discrimination against sexual minorities among MSM in 23 US cities, 2017

| Factor                                                                                                   | Adjusted PR (95% CI) <sup>3</sup> | P-value |
|----------------------------------------------------------------------------------------------------------|-----------------------------------|---------|
| Most people in my community would:<br>Discriminate against PWH <sup>1</sup><br>Disagree/Neutral<br>Agree | Ref<br>0.81 (0.61-1.07)           | 0.15    |
| Would not the support of rights of PWH<br>Disagree/Neutral<br>Agree                                      | Ref<br>0.90 (0.55-1.4)            | 0.62    |
| Would not be friends with PWH<br>Disagree/Neutral<br>Agree                                               | Ref<br>1.53 (1.09-2.13)           | 0.01    |
| Belief PWH got what they deserved<br>Disagree/Neutral<br>Agree                                           | Ref<br>0.96 (0.70-1.32)           | 0.80    |
| Experienced verbal discrimination <sup>2</sup><br>No<br>Yes                                              | Ref<br>0.80 (0.67-0.96)           | 0.02    |
| Discrimination – Poor Service<br>No<br>Yes                                                               | Ref<br>1.14 (0.92-1.41)           | 0.22    |
| Discrimination – Work/school<br>No<br>Yes                                                                | Ref<br>1.14 (0.92-1.42)           | 0.23    |
| Discrimination – Healthcare<br>No<br>Yes                                                                 | Ref<br>1.20 (0.74-1.95)           | 0.45    |
| Discrimination – Physical Assault<br>No<br>Yes                                                           | Ref<br>0.87 (0.63-1.22)           | 0.43    |

<sup>1</sup> HIV stigma measures were on a five point Likert scale from 1 (Strongly Disagree) to 5 (Strongly Agree) and coded as Disagree/Neutral (1-3) or Agree (4-5).

<sup>2</sup> Experiences of discrimination due to sexual identity measures were binary, Yes or No.

<sup>3</sup> Prevalence rate ratio (PR) and P-values estimated from separate weighted Poisson models adjusted for age, race/ethnicity, and city. NHBS survey interview weights were based on venue attending MSM.
