# Supplementary material for: HIV Self-testing and Risk Behaviors Among Men Who Have Sex With Men in 23 US Cities, 2017
Source: PubMed Central journal article supplement (PMC9856873; doi:10.1001/jamanetworkopen.2022.47540), 2022-12-19
Supplement: jamanetwopen-e2247540-s002.pdf [file jamanetwopen-e2247540-s002.pdf]

Supplemental Online Content: Nonauthor Collaborators

\*First name, last name, and suffix (if applicable) are required and will appear in PubMed.

| <b>*Group Name(s): NHBS Study Group</b>  |                   |                              |                  |             |                                          |                                                         |                                                                                            |
|------------------------------------------|-------------------|------------------------------|------------------|-------------|------------------------------------------|---------------------------------------------------------|--------------------------------------------------------------------------------------------|
| <b>*First Name and Middle Initial(s)</b> | <b>*Last Name</b> | <b>*Suffix (eg, Jr, III)</b> | Academic Degrees | Institution | Location (city, state/province, country) | Role or Contribution, eg, chair, principal investigator | Group (if more than 1 Group listed in the byline) and/or Subgroup (eg, Steering Committee) |
| Pascale                                  | Wortley           |                              |                  |             |                                          |                                                         |                                                                                            |
| Jeff                                     | Todd              |                              |                  |             |                                          |                                                         |                                                                                            |
| David                                    | Melton            |                              |                  |             |                                          |                                                         |                                                                                            |
| Colin                                    | Flynn             |                              |                  |             |                                          |                                                         |                                                                                            |
| Danielle                                 | German            |                              |                  |             |                                          |                                                         |                                                                                            |
| Monina                                   | Klevens           |                              |                  |             |                                          |                                                         |                                                                                            |
| Rose                                     | Doherty           |                              |                  |             |                                          |                                                         |                                                                                            |
| Conall                                   | O'Cleirigh        |                              |                  |             |                                          |                                                         |                                                                                            |
| Stephanie M.                             | Schuetze          |                              |                  |             |                                          |                                                         |                                                                                            |
| David                                    | Kern              |                              |                  |             |                                          |                                                         |                                                                                            |
| Antonio D.                               | Jimenez           |                              |                  |             |                                          |                                                         |                                                                                            |
| Jonathon                                 | Poe               |                              |                  |             |                                          |                                                         |                                                                                            |
| Margaret                                 | Vaaler            |                              |                  |             |                                          |                                                         |                                                                                            |
| Jie                                      | Deng              |                              |                  |             |                                          |                                                         |                                                                                            |
| Alia                                     | Al-Tayyib         |                              |                  |             |                                          |                                                         |                                                                                            |
| Melanie                                  | Mattson           |                              |                  |             |                                          |                                                         |                                                                                            |
| Vivian                                   | Griffin           |                              |                  |             |                                          |                                                         |                                                                                            |
| Emily                                    | Higgins           |                              |                  |             |                                          |                                                         |                                                                                            |
| Mary-Grace                               | Brandt            |                              |                  |             |                                          |                                                         |                                                                                            |
| Salma                                    | Khuwaja           |                              |                  |             |                                          |                                                         |                                                                                            |
| Zaida                                    | Lopez             |                              |                  |             |                                          |                                                         |                                                                                            |
| Paige                                    | Padgett           |                              |                  |             |                                          |                                                         |                                                                                            |
| Ekow Kwa                                 | Sey               |                              |                  |             |                                          |                                                         |                                                                                            |
| Yingbo                                   | Ma                |                              |                  |             |                                          |                                                         |                                                                                            |
| Shanell L.                               | McGoy             |                              |                  |             |                                          |                                                         |                                                                                            |
| Meredith                                 | Brantley          |                              |                  |             |                                          |                                                         |                                                                                            |
| Randi                                    | Rosack            |                              |                  |             |                                          |                                                         |                                                                                            |
| Emma                                     | Spencer           |                              |                  |             |                                          |                                                         |                                                                                            |
| Willie                                   | Nixon             |                              |                  |             |                                          |                                                         |                                                                                            |

Supplemental Online Content: Nonauthor Collaborators

\*First name, last name, and suffix (if applicable) are required and will appear in PubMed.

| *First Name and Middle Initial(s) | *Last Name  | *Suffix (eg, Jr, III) | Academic Degrees | Institution | Location (city, state/province, country) | Role or Contribution, eg, chair, principal investigator | Group (if more than 1 Group listed in the byline) and/or Subgroup (eg, Steering Committee) |
|-----------------------------------|-------------|-----------------------|------------------|-------------|------------------------------------------|---------------------------------------------------------|--------------------------------------------------------------------------------------------|
| David                             | Forrest     |                       |                  |             |                                          |                                                         |                                                                                            |
| Bridget                           | Anderson    |                       |                  |             |                                          |                                                         |                                                                                            |
| Ashley                            | Tate        |                       |                  |             |                                          |                                                         |                                                                                            |
| Meaghan                           | Abrego      |                       |                  |             |                                          |                                                         |                                                                                            |
| William T.                        | Robinson    |                       |                  |             |                                          |                                                         |                                                                                            |
| Narquis                           | Barak       |                       |                  |             |                                          |                                                         |                                                                                            |
| Jeremy M.                         | Beckford    |                       |                  |             |                                          |                                                         |                                                                                            |
| Sarah                             | Braunstein  |                       |                  |             |                                          |                                                         |                                                                                            |
| Alexis                            | Rivera      |                       |                  |             |                                          |                                                         |                                                                                            |
| Sidney                            | Carrillo    |                       |                  |             |                                          |                                                         |                                                                                            |
| Barbara                           | Bolden      |                       |                  |             |                                          |                                                         |                                                                                            |
| Afework                           | Wogayehu    |                       |                  |             |                                          |                                                         |                                                                                            |
| Henry                             | Godette     |                       |                  |             |                                          |                                                         |                                                                                            |
| Kathleen A.                       | Brady       |                       |                  |             |                                          |                                                         |                                                                                            |
| Chrysanthus                       | Nnumolu     |                       |                  |             |                                          |                                                         |                                                                                            |
| Jennifer                          | Shinefeld   |                       |                  |             |                                          |                                                         |                                                                                            |
| Sean                              | Schafer     |                       |                  |             |                                          |                                                         |                                                                                            |
| E. Roberto                        | Orellana    |                       |                  |             |                                          |                                                         |                                                                                            |
| Amisha                            | Bhattari    |                       |                  |             |                                          |                                                         |                                                                                            |
| Anna                              | Flynn       |                       |                  |             |                                          |                                                         |                                                                                            |
| Rosalinda                         | Cano        |                       |                  |             |                                          |                                                         |                                                                                            |
| H. Fisher                         | Raymond     |                       |                  |             |                                          |                                                         |                                                                                            |
| Theresa                           | Ick         |                       |                  |             |                                          |                                                         |                                                                                            |
| Sandra Miranda                    | De León     |                       |                  |             |                                          |                                                         |                                                                                            |
| Yadira                            | Rolón-Colón |                       |                  |             |                                          |                                                         |                                                                                            |
| Tom                               | Jaenicke    |                       |                  |             |                                          |                                                         |                                                                                            |
| Sara                              | Glick       |                       |                  |             |                                          |                                                         |                                                                                            |
| Celestine                         | Buyu        |                       |                  |             |                                          |                                                         |                                                                                            |
| Toyah                             | Reid        |                       |                  |             |                                          |                                                         |                                                                                            |
| Karen                             | Diepstra    |                       |                  |             |                                          |                                                         |                                                                                            |
| Jenevieve                         | Opoku       |                       |                  |             |                                          |                                                         |                                                                                            |

Supplemental Online Content: Nonauthor Collaborators

\*First name, last name, and suffix (if applicable) are required and will appear in PubMed.

| *First Name and Middle Initial(s) | *Last Name      | *Suffix (eg, Jr, III) | Academic Degrees | Institution | Location (city, state/province, country) | Role or Contribution, eg, chair, principal investigator | Group (if more than 1 Group listed in the byline) and/or Subgroup (eg, Steering Committee) |
|-----------------------------------|-----------------|-----------------------|------------------|-------------|------------------------------------------|---------------------------------------------------------|--------------------------------------------------------------------------------------------|
| Irene                             | Kuo             |                       |                  |             |                                          |                                                         |                                                                                            |
| Monica                            | Adams           |                       |                  |             |                                          |                                                         |                                                                                            |
| Chrstine                          | Agnew Brune     |                       |                  |             |                                          |                                                         |                                                                                            |
| Qian                              | Anderson        |                       |                  |             |                                          |                                                         |                                                                                            |
| Alexandra                         | Balaji          |                       |                  |             |                                          |                                                         |                                                                                            |
| Dita                              | Broz            |                       |                  |             |                                          |                                                         |                                                                                            |
| Janet                             | Burnett         |                       |                  |             |                                          |                                                         |                                                                                            |
| Johanna                           | Chapin-Bardales |                       |                  |             |                                          |                                                         |                                                                                            |
| Melissa                           | Cribbin         |                       |                  |             |                                          |                                                         |                                                                                            |
| YenTyng                           | Chen            |                       |                  |             |                                          |                                                         |                                                                                            |
| Paul                              | Denning         |                       |                  |             |                                          |                                                         |                                                                                            |
| Katherine                         | Doyle           |                       |                  |             |                                          |                                                         |                                                                                            |
| Teresa                            | Finlayson       |                       |                  |             |                                          |                                                         |                                                                                            |
| Senad                             | Handanagic      |                       |                  |             |                                          |                                                         |                                                                                            |
| Brooke                            | Hoots           |                       |                  |             |                                          |                                                         |                                                                                            |
| Wade                              | Ivy             |                       |                  |             |                                          |                                                         |                                                                                            |
| Kathryn                           | Lee             |                       |                  |             |                                          |                                                         |                                                                                            |
| Rashunda                          | Lewis           |                       |                  |             |                                          |                                                         |                                                                                            |
| Lina                              | Nerlander       |                       |                  |             |                                          |                                                         |                                                                                            |
| Evelyn                            | Olansky         |                       |                  |             |                                          |                                                         |                                                                                            |
| Gabriela                          | Paz-Bailey      |                       |                  |             |                                          |                                                         |                                                                                            |
| Taylor                            | Robbins         |                       |                  |             |                                          |                                                         |                                                                                            |
| Catlainn                          | Sionean         |                       |                  |             |                                          |                                                         |                                                                                            |
| Amanda                            | Smith           |                       |                  |             |                                          |                                                         |                                                                                            |
| Anna                              | Templinskaya    |                       |                  |             |                                          |                                                         |                                                                                            |
| Lindsay                           | Trujillo        |                       |                  |             |                                          |                                                         |                                                                                            |
| Cyprian                           | Wejnert         |                       |                  |             |                                          |                                                         |                                                                                            |
| Akilah                            | Wise            |                       |                  |             |                                          |                                                         |                                                                                            |
| Mingjing                          | Xia             |                       |                  |             |                                          |                                                         |                                                                                            |
