# Supplementary material for: HIV Self-testing and Risk Behaviors Among Men Who Have Sex With Men in 23 US Cities, 2017
Source: PubMed Central journal article supplement (PMC9856873; doi:10.1001/jamanetworkopen.2022.47540), 2022-12-19
Supplement: jamanetwopen-e2247540-s003.pdf [file jamanetwopen-e2247540-s003.pdf]

## Data Sharing Statement

Bien-Gund. HIV Self-testing and Risk Behaviors Among Men Who Have Sex With Men in 23 US Cities, 2017. *JAMA Netw Open*. Published December 19, 2022.

doi:10.1001/jamanetworkopen.2022.47540

### Data

**Data available:** Yes

**Data types:** Data dictionary

**How to access data:** <https://www.cdc.gov/hiv/statistics/systems/nhbs/methods-questionnaires.html>

**When available:** With publication

### Supporting Documents

**Document types:** None

### Additional Information

**Who can access the data:** Researchers whose proposed use of the data has been approved and sponsored by any of the NHBS sites and subsequently approved by the national NHBS team.

**Types of analyses:** Researchers can propose analyses to NHBS, which if approved, a restricted dataset can be made available.

**Mechanisms of data availability:** Data can be made without investigator support, by contacting NHBS study site directors directly and obtaining local site support.
